# Supplementary material
Source: publisher figshare collection journal article supplement (https://tandf.figshare.com/ndownloader/files/18714974)

**Supplementary 2:** A- Strict consensus of 14 most parsimonious trees obtained by EW analysis and branch support values (Bremer). Consistency Index (CI): 0.51; Retention Index (RI): 0.75. B- Support values (Jacknife) for the EWA. C- Majority consensus tree (85%) from the EW analysis

A- B-


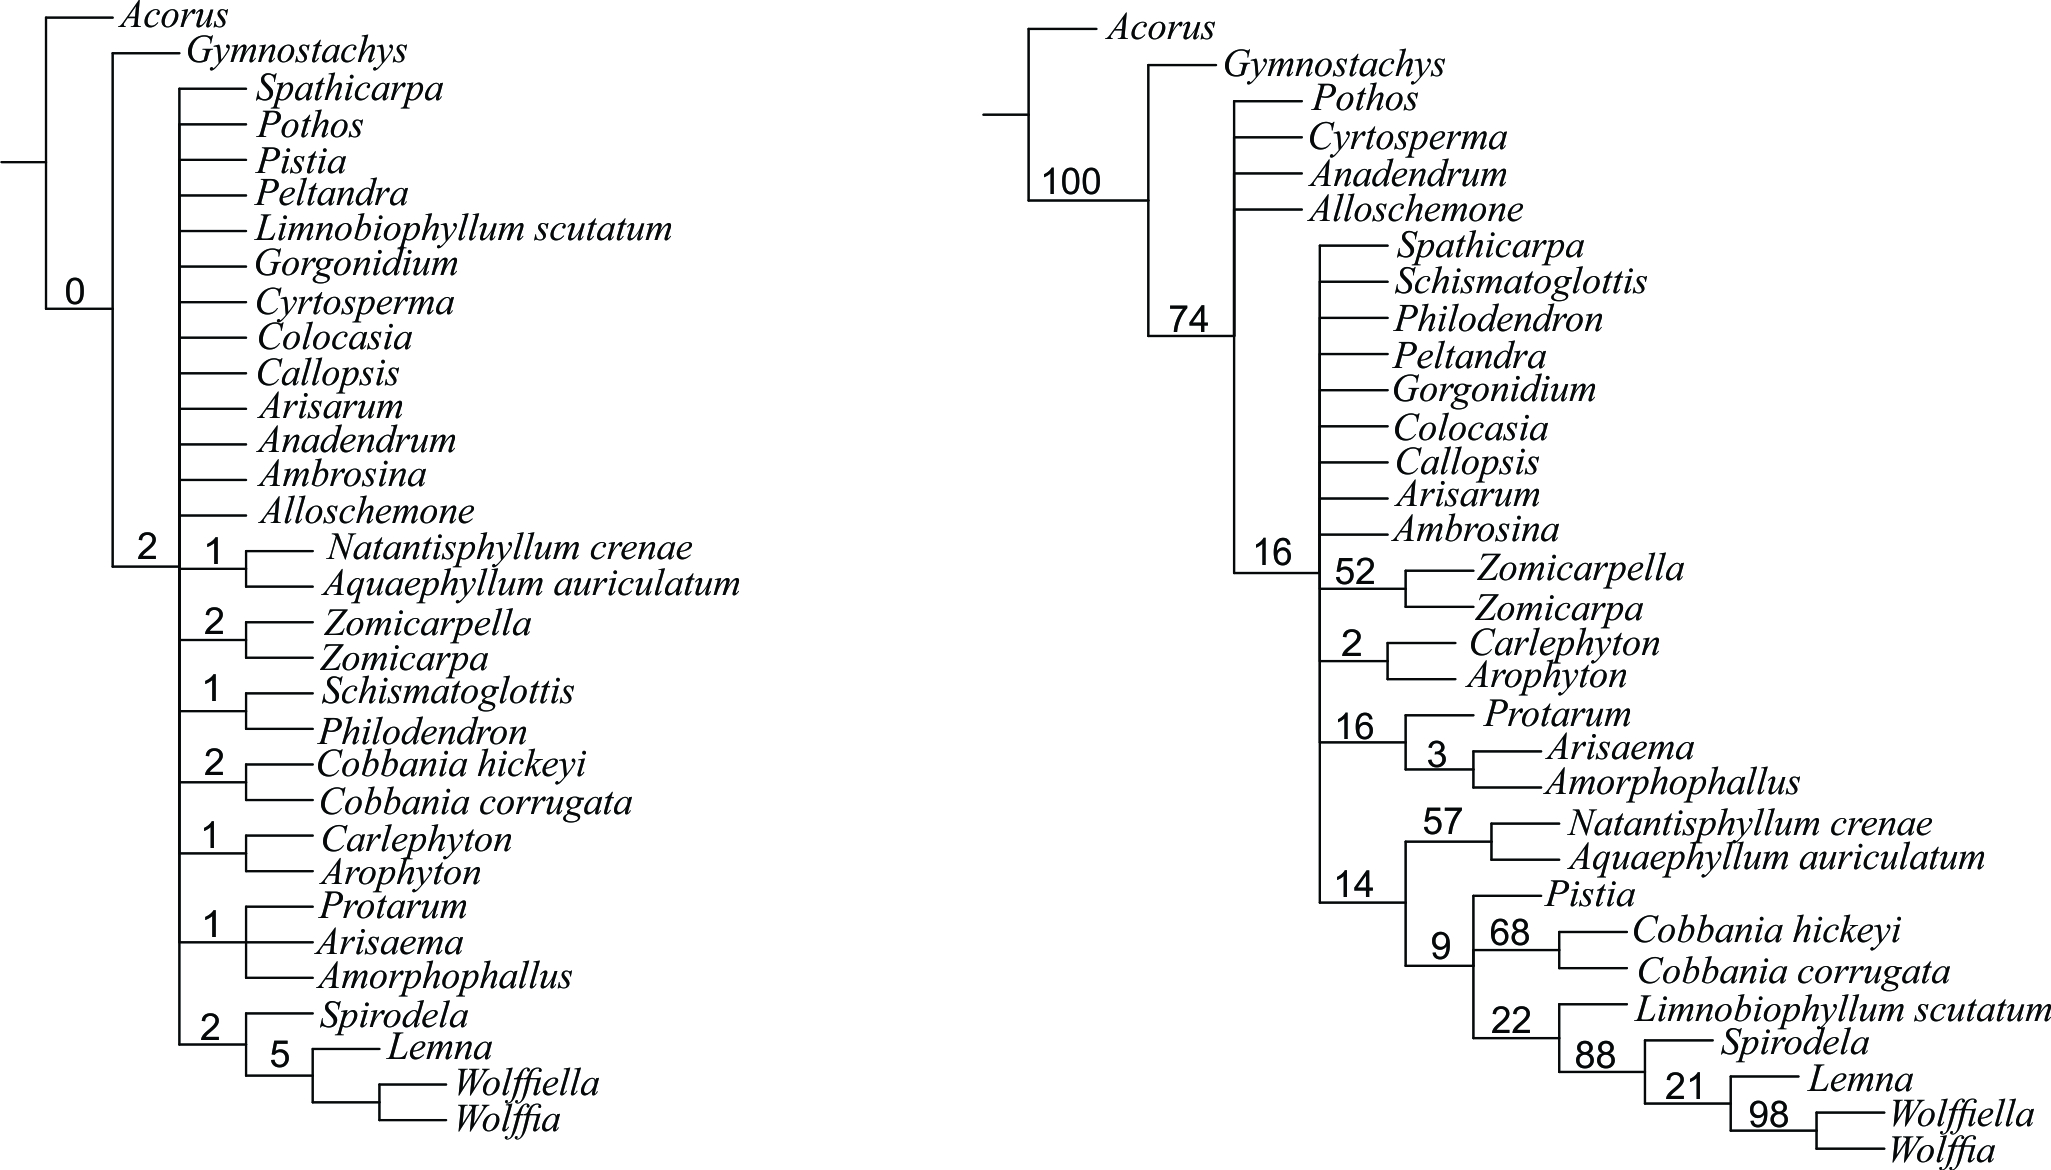


C-


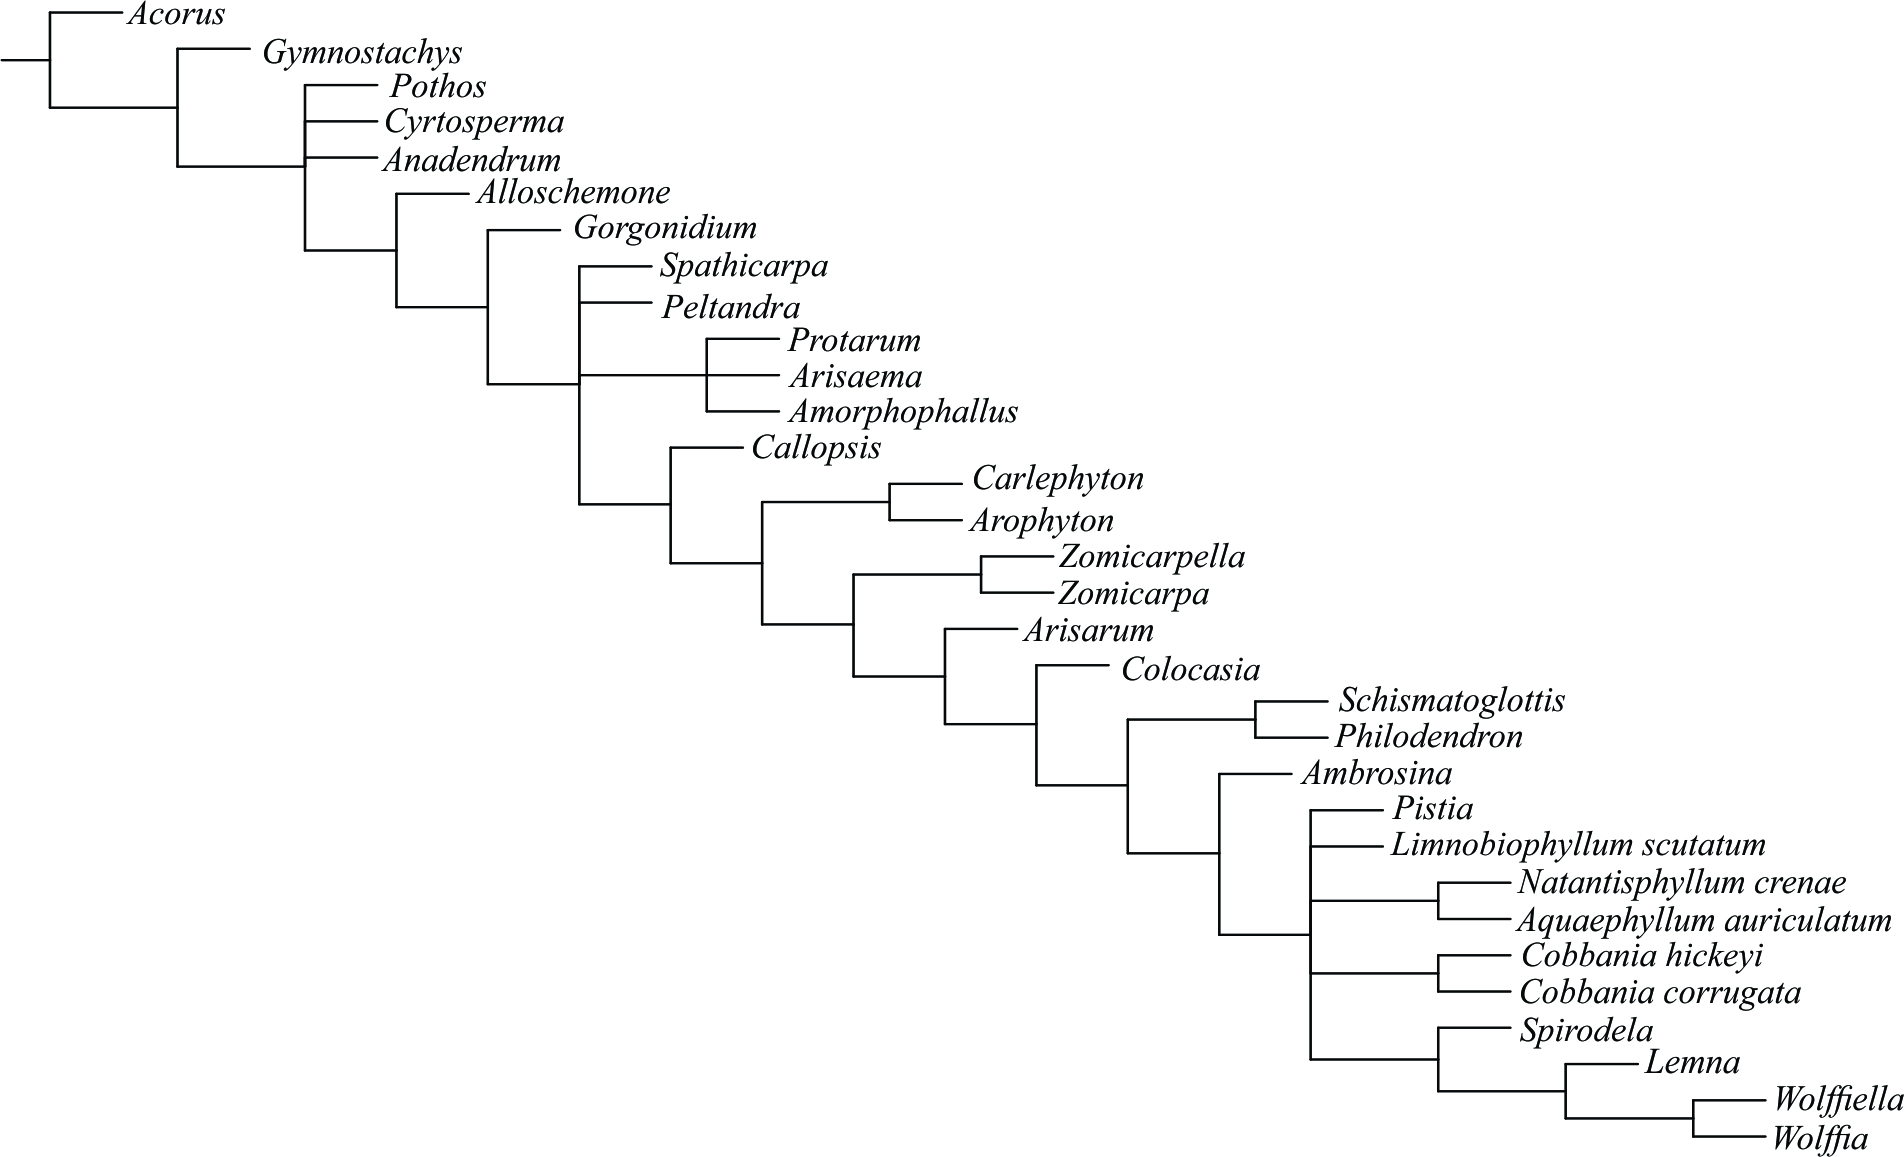

Supplement: Supplementary file 1 [file 18714974]
